# Supplementary material for: Substituent group-tunable hydrogen evolution activity observed in isostructural Cu(ii)-based coordination polymer photocatalysts
Source: Royal Society of Chemistry journal article supplement (doi:10.1039/c9dt04567h), 2019-12-26
Supplement: c9dt04567h1.pdf [file c9dt04567h1.pdf]

**Supporting information**

**Substituent group-tunable hydrogen evolution activity observed in isostructural Cu(II)-based coordination polymer photocatalysts**

Xue-Jiao Dai,<sup>†</sup> Jia-Jun Wang,<sup>†</sup> Lei Li,<sup>†</sup> Bo Ding,<sup>†</sup> Zheng-Yu Liu,<sup>†</sup> Xiao-Jun Zhao<sup>\*,†,‡</sup> and En-Cui Yang<sup>\*,†</sup>

<sup>†</sup> *Department of Chemistry, Collaborative Innovation Center of Chemical Science and Engineering, Nankai University, Tianjin 300071, People's Republic of China*

<sup>‡</sup> *College of Chemistry, Key Laboratory of Inorganic-Organic Hybrid Functional Material Chemistry, Ministry of Education, Tianjin Key Laboratory of Structure and Performance for Functional Molecules, Tianjin Normal University, Tianjin 300387, People's Republic of China*

**Table S1** Crystal and structure refinement data for **Cu-CP-R**.<sup>a</sup>

|                                                       | <b>Cu-CP-NH<sub>2</sub></b>                                     | <b>Cu-CP-NO<sub>2</sub></b>                                     | <b>Cu-CP-H</b>                                                  | <b>Cu-CP-OH</b>                                                 | <b>Cu-CP-Br</b>                                                    |
|-------------------------------------------------------|-----------------------------------------------------------------|-----------------------------------------------------------------|-----------------------------------------------------------------|-----------------------------------------------------------------|--------------------------------------------------------------------|
| Temperature                                           | 293                                                             | 127                                                             | 118.6                                                           | 293                                                             | 296                                                                |
| empirical formula                                     | C <sub>50</sub> H <sub>35</sub> CuN <sub>7</sub> O <sub>6</sub> | C <sub>50</sub> H <sub>33</sub> CuN <sub>7</sub> O <sub>8</sub> | C <sub>50</sub> H <sub>34</sub> CuN <sub>6</sub> O <sub>6</sub> | C <sub>50</sub> H <sub>34</sub> CuN <sub>6</sub> O <sub>7</sub> | C <sub>50</sub> H <sub>32</sub> CuN <sub>6</sub> O <sub>6</sub> Br |
| $F_w$                                                 | 893.39                                                          | 923.37                                                          | 878.37                                                          | 894.37                                                          | 956.26                                                             |
| cryst size (mm)                                       | 0.25 × 0.22 × 0.20                                              | 0.22 × 0.21 × 0.20                                              | 0.25 × 0.22 × 0.20                                              | 0.25 × 0.22 × 0.20                                              | 0.22 × 0.21 × 0.18                                                 |
| cryst syst                                            | Triclinic                                                       | Triclinic                                                       | Triclinic                                                       | Triclinic                                                       | Triclinic                                                          |
| space group                                           | <i>P</i> -1                                                        |
| <i>a</i> (Å)                                          | 7.1100(5)                                                       | 7.1161(8)                                                       | 7.0631(4)                                                       | 7.1213(3)                                                       | 7.2467(13)                                                         |
| <i>b</i> (Å)                                          | 10.9172(8)                                                      | 10.8134(14)                                                     | 10.9098(7)                                                      | 10.9493(5)                                                      | 10.935(2)                                                          |
| <i>c</i> (Å)                                          | 13.7599(10)                                                     | 13.898(2)                                                       | 13.8073(8)                                                      | 13.8046(6)                                                      | 13.919(3)                                                          |
| $\alpha$ (°)                                          | 82.193(6)                                                       | 81.988(12)                                                      | 82.556(5)                                                       | 81.707(4)                                                       | 82.290(4)                                                          |
| $\beta$ (°)                                           | 87.050(6)                                                       | 86.064(10)                                                      | 89.225(5)                                                       | 88.055(4)                                                       | 87.182(4)                                                          |
| $\gamma$ (°)                                          | 72.875(6)                                                       | 74.160(10)                                                      | 73.069(6)                                                       | 72.596(4)                                                       | 72.275(4)                                                          |
| <i>V</i> (Å <sup>3</sup> )                            | 1011.16(13)                                                     | 1018.3(2)                                                       | 1008.93(11)                                                     | 1016.33(8)                                                      | 1041.1(3)                                                          |
| <i>Z</i> , <i>D<sub>c</sub></i> (g cm <sup>-3</sup> ) | 1, 1.467                                                        | 1, 1.506                                                        | 1, 1.446                                                        | 1, 1.461                                                        | 1, 1.525                                                           |
| <i>h</i> / <i>k</i> / <i>l</i>                        | - 8, 8 / - 12, 13 / - 16, 16                                    | - 8, 8 / - 12, 12 / - 16, 16                                    | - 8, 8 / - 8, 12 / - 16, 16                                     | - 8, 8 / - 13, 11 / - 16, 16                                    | - 8, 8 / - 12, 12 / - 16, 13                                       |
| <i>F</i> (000)                                        | 461                                                             | 475                                                             | 453                                                             | 461                                                             | 486                                                                |
| $\mu$ (mm <sup>-1</sup> )                             | 1.288                                                           | 0.606                                                           | 0.603                                                           | 1.294                                                           | 1.545                                                              |
| reflections collected / unique                        | 7041 / 3601                                                     | 6857 / 3584                                                     | 6646 / 3554                                                     | 6457 / 3633                                                     | 6040 / 3663                                                        |
| $R_{\text{int}}$                                      | 0.2331                                                          | 0.0582                                                          | 0.0505                                                          | 0.0345                                                          | 0.0451                                                             |
| data / restraints / params                            | 3601 / 54 / 297                                                 | 3585 / 54 / 314                                                 | 3554 / 0 / 287                                                  | 3633 / 7 / 296                                                  | 3663 / 12 / 304                                                    |
| $R_1^a$ , $wR_2^b$ ( $I > 2\sigma(I)$ )               | 0.1637, 0.3632                                                  | 0.0998, 0.1954                                                  | 0.0481, 0.0989                                                  | 0.0430, 0.1074                                                  | 0.0911, 0.2312                                                     |
| $R_1$ , $wR_2$ (all data)                             | 0.2252, 0.4191                                                  | 0.1388, 0.2115                                                  | 0.0635, 0.1064                                                  | 0.0508, 0.1144                                                  | 0.1339, 0.2565                                                     |

---

|                                                                             |             |             |             |             |             |
|-----------------------------------------------------------------------------|-------------|-------------|-------------|-------------|-------------|
| <i>GOF on <math>F^2</math></i>                                              | 1.029       | 1.183       | 1.045       | 1.059       | 1.073       |
| $\Delta\rho_{\max}, \Delta\rho_{\min}$ ( $\text{e} \cdot \text{\AA}^{-3}$ ) | 1.84, -2.02 | 0.97, -0.56 | 0.45, -0.70 | 0.73, -0.47 | 0.58, -1.45 |

---

<sup>a</sup>  $R_1 = \Sigma(|F_o| - |F_c|) / \Sigma|F_o|$ ; <sup>b</sup>  $wR_2 = [\Sigma w(|F_o|^2 - |F_c|^2)^2 / \Sigma w(F_o^2)^2]^{1/2}$

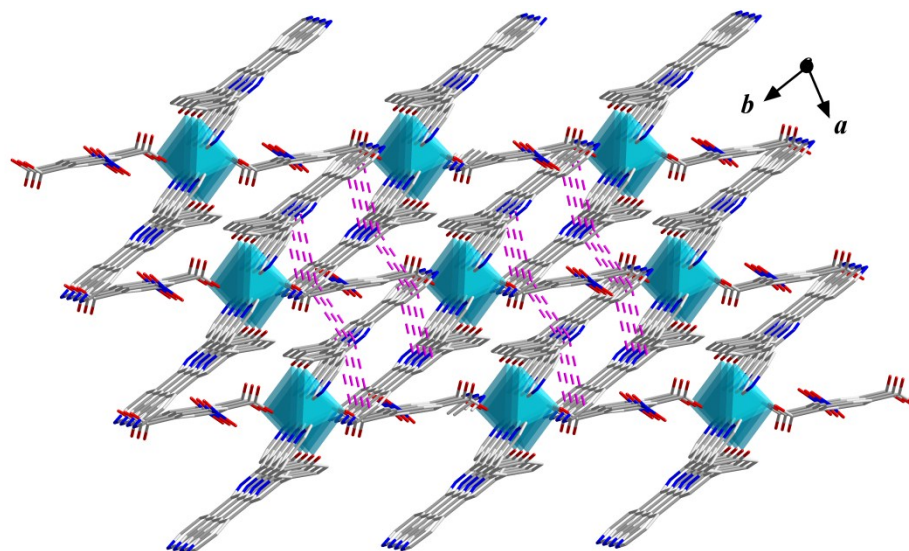

Fig. S1 3D stacking structure of Cu-CP-NO<sub>2</sub>.

**Table S2.** Selected bond lengths (Å) and angles (deg) for Cu-CP-R <sup>a</sup>

| Parameters                     | R               |                 |            |            |            | Average value |
|--------------------------------|-----------------|-----------------|------------|------------|------------|---------------|
|                                | NH <sub>2</sub> | NO <sub>2</sub> | H          | OH         | Br         |               |
| Cu(1)–O(1)                     | 1.948(6)        | 1.977(5)        | 1.954(2)   | 1.9584(14) | 1.953(4)   | 1.958 ± 0.019 |
| Cu(1)–N(2)                     | 2.014(7)        | 1.992(5)        | 1.993(2)   | 1.9917(17) | 1.998(6)   | 1.998 ± 0.019 |
| Cu(1)–O(3) <sup>#2</sup>       | 2.6159(76)      | 2.6246(56)      | 2.6234(56) | 2.6198(22) | 2.6799(70) | 2.633 ± 0.047 |
| O(1)–Cu(1)–N(2)                | 89.7(3)         | 89.9(2)         | 89.54(8)   | 89.07(7)   | 90.0(2)    | 89.64 ± 0.57  |
| O(1) <sup>#1</sup> –Cu(1)–N(2) | 90.3(3)         | 90.1(2)         | 90.46(8)   | 90.93(7)   | 90.0(2)    | 90.36 ± 0.57  |

<sup>a</sup> Symmetry codes: <sup>#1</sup> 1 – x, 2 – y, – z; <sup>#2</sup> x, y, – 1 + z.

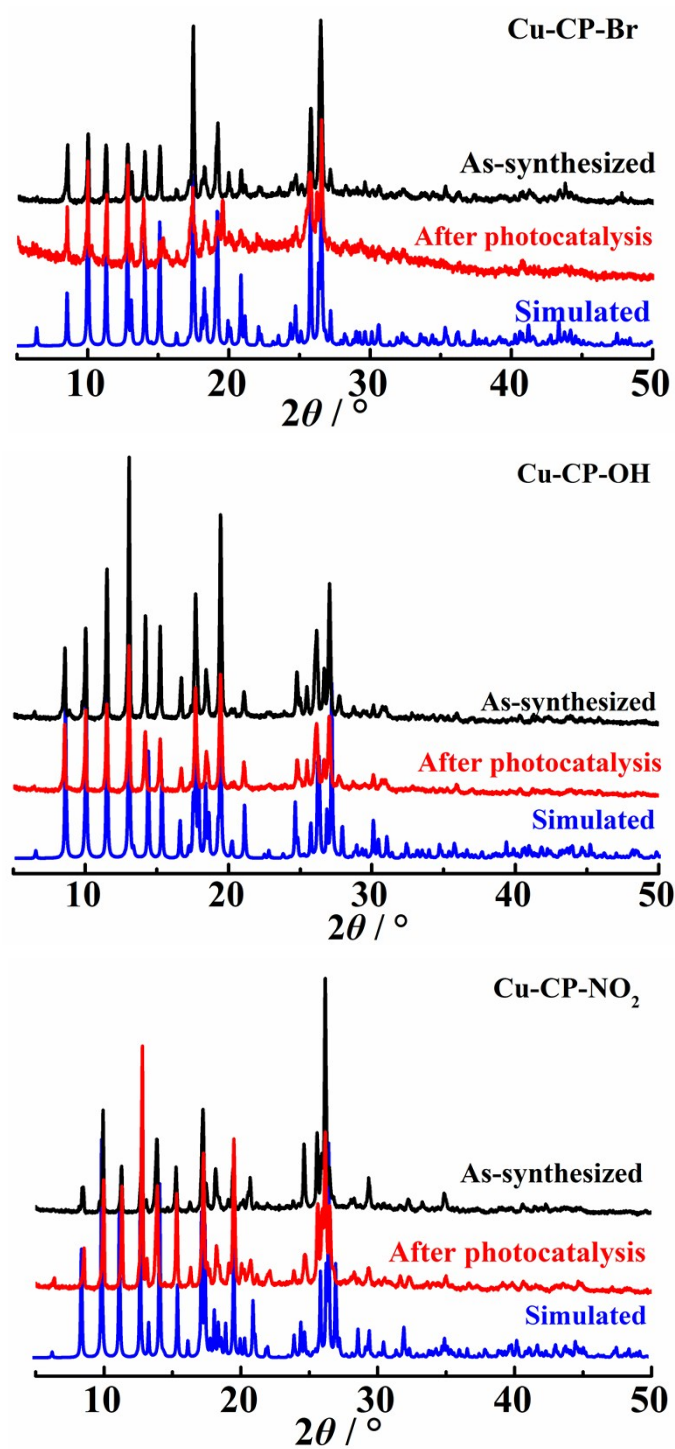

Fig. S2 PXRD patterns for the as-synthesized photocatalysts before and after photocatalysis.

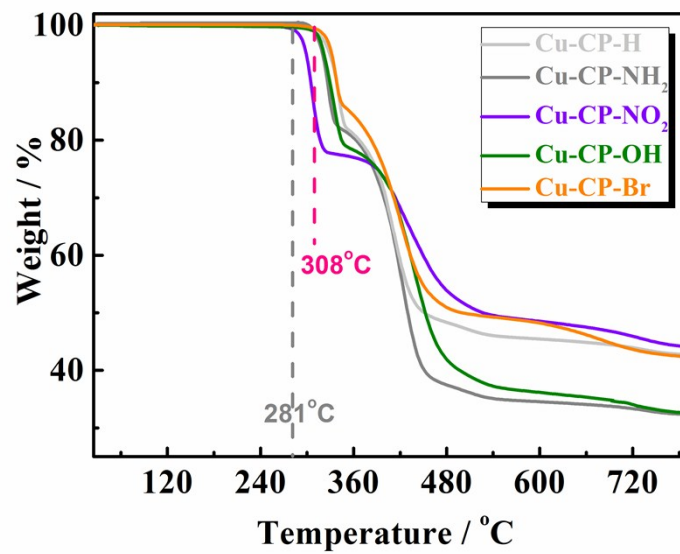

Fig. S3 TG curves of the five Cu-CP-R photocatalysts.

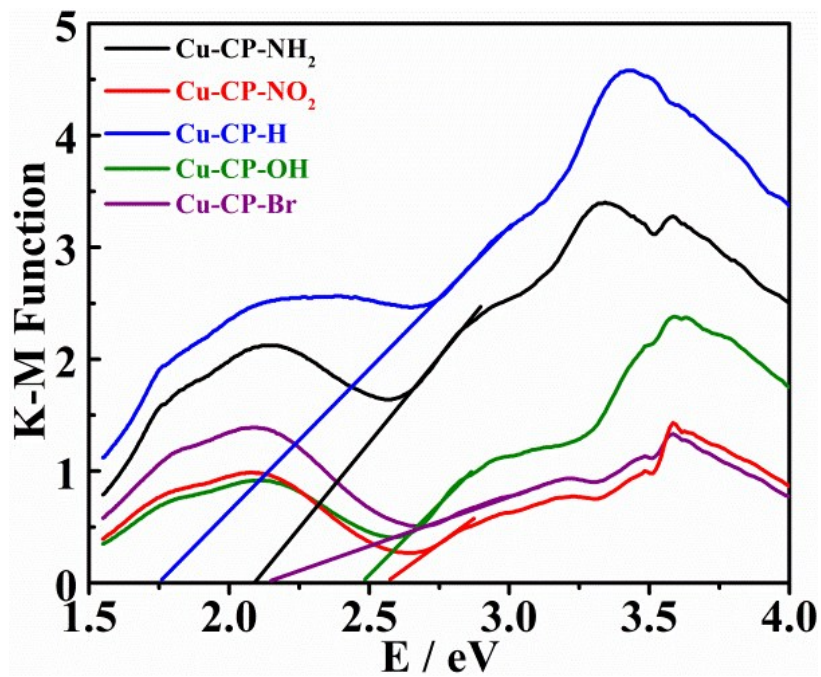

Fig. S4 Band gaps for the five Cu-CP-R photocatalysts.



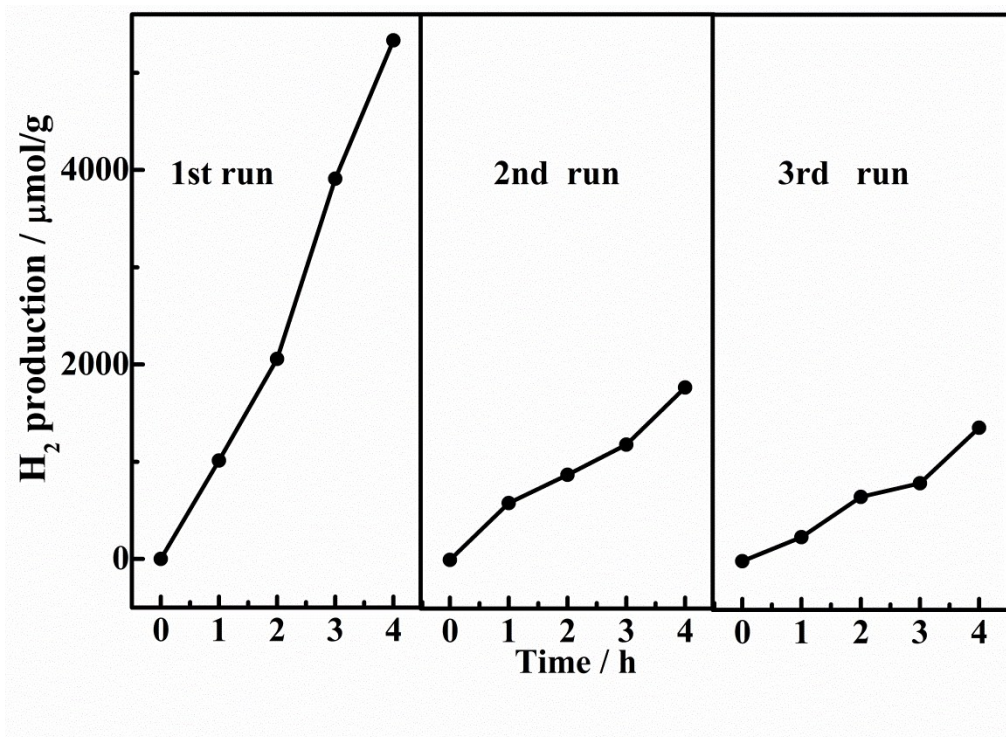

Fig. S5 Cycling tests of the photocatalytic hydrogen evolution for Cu-CP-NO<sub>2</sub>.

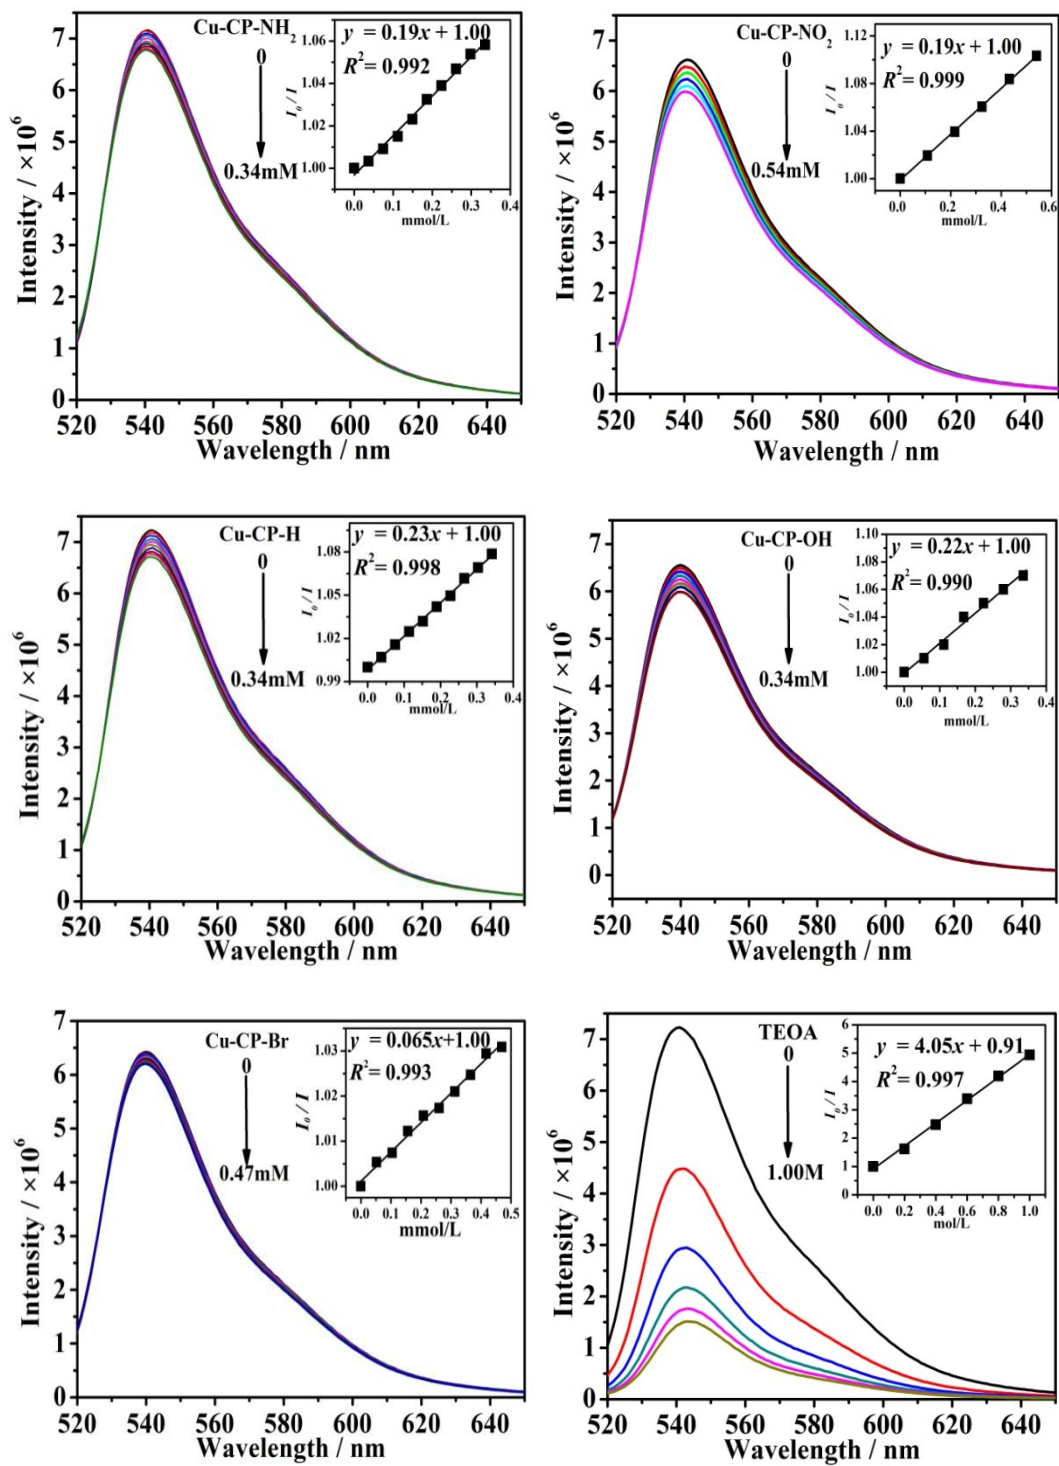

**Fig. S6** Emission spectra of EY by **Cu-CP-R** samples and TEOA in an aqueous solution (Inset: Stern-Volmer plot for the photoluminescence quenching of EY by **Cu-CP-R** or TEOA).
